# Supplementary material for: The Actuator Farm Model for LES of Wind Farm-Induced Atmospheric Gravity Waves and Farm-Farm Interaction
Source: Copernicus journal article supplement (doi:10.5194/wes-2024-89), 2024-07-29
Supplement: Supplementary file [file wes-2024-89-AC1-supplement.pdf]

University of British Columbia

The Actuator Farm Model for LES of Wind Farm-Induced Atmospheric  
Gravity Waves and Farm-Farm Interaction

## **Response to Reviewer 1**

Exec. S. Stipa - September 12, 2024

We would like to thank the reviewer for the time dedicated to revising the paper. We proceed with answering and clarifying, where possible, their comments.

Our response, denoted in black, is shown below, while the reviewer's comments are denoted in blue. Please refer to the track changes document for a detailed overview of the changes made to the manuscript.

This paper feels very long. The introduction has information that does not seem relevant to the topic the paper is addressing. Additionally, there are a lot of tests that are included (the gravity wave tests feel like they could be a study on their own) and it makes it difficult to retain all of the significant findings. I'm not sure what the solution is for this, but if the authors have ideas of how to make the paper more concise, I think it would benefit the paper a lot.

We agree with the reviewer that this paper can be perceived as long. For this reason, two sections of the paper have been moved to an appendix, resulting in an enhanced focus of the manuscript towards the AFM. In particular, former Sect. 2.3, which explains a correction to a wall model based on the classic Monin and Obukhov (1954) similarity theory, and former Sect. 2.4, where such wall model correction is verified for precursor simulations, have been moved to appendices A and B, respectively. This extensively shortens the paper and simplifies its structure around the sole AFM.

However, the authors would like to stress that, in general, the development of an actuator model where a coarser grid resolution can be employed with good accuracy compared to older parameterizations that employ a finer grid, cannot be used as-is in the context of wall modeled LES of the ABL. In this case, the grid coarsening allowed by using the AFM has to be corroborated by an accurate representation of the vertical velocity and shear stress profiles within the ABL. While ensuring that this happens has nothing to do with the AFM itself, it is something that always has to be considered as the grid is coarsened. Moreover, it does have an impact on the simulation results, as the ABL evolution remains negatively affected by grid coarsening when using conventional wall modeling approaches.

For this reason, we were reluctant to relegate to an appendix our simple approach that allows us to retain the vertical velocity and shear stress profile observed in finer LES simulations, as it crucially allows us to conduct wall modeled LESs of the ABL flow around a wind farm when it is modeled using the AFM. In the end, although the topic is important, it does not represent the core of the manuscript and for this reason we agree to move it to an appendix. Nevertheless, we strongly believe that it should be retained at least in this form as it crucially relates to those studies for which the AFM is most useful, i.e. the farm-farm interaction and the farm-gravity wave interaction cases.

Regarding the introduction, we feel that the story line is solid. In fact, after emphasizing the fact that large-scale installations are uncovering new physical phenomena in a broader range of spatial and temporal scales (e.g. cluster wakes and gravity waves), we highlight the various modeling tools that can be used to study this new problem today. In our opinion, it is very important at this point to address the limitations of engineering models as they (alongside the limitations of wind farm parameterizations in WRF) are what motivates large-scale LES studies for which the AFM will be useful.

Finally, we believe that the two large test cases performed in the paper (cluster wakes and gravity waves) are good examples of how the model can be directly applied for more realistic applications. This in our opinion makes the manuscript more complete and it is also beneficial for future use of the model by the research community in similar applications.

The abstract is quite lengthy. Consider shortening it so readers can more easily find the key message.

The abstract has been shortened by removing information non strictly related to the AFM and its usage exemplified by the test cases covered throughout the manuscript.

Some figures (e.g., 8, 9, 16, 17, etc.) are quite small and difficult to see the aspects that are discussed in the text. Consider changing the orientation of the panels or decreasing the number of panels to make the figures more legible.

The size of former Figs. 8, 9, 16, 22, 23 has been increased. These are now Figs. 7, 8, 15, 21, 22, respectively, in the revised manuscript.

## **References**

Monin, A. and Obukhov, A.: Basic laws of turbulent mixing in the surface layer of the atmosphere, Tr. Akad. Nauk SSSR Geophys. Inst., 151, 163–187, 1954.
